# Supplementary material for: Stage-Specific Non-Coding RNA Expression Patterns during In Vitro Human B Cell Differentiation into Antibody Secreting Plasma Cells
Source: Noncoding RNA. 2022 Feb 5;8(1):15. doi: 10.3390/ncrna8010015 (PMC8878715; doi:10.3390/ncrna8010015)
Supplement: Supplementary file 1 [file ncrna-08-00015-s001.zip › Supplemental Table S2.xlsx]

## Sheet: Sheet1
Supplemental Table S2. Differentially expressed ncRNA transcripts during differentiation from B cells to IVPCs.
Ensembl ID	ncRNA	ncRNA classes	p-value*	Heatmap Cluster
ENSG00000253364	RP11-731F5.2	lincRNA	1.32247e-18	I
ENSG00000280111	CTA-292E10.9	antisense	1.49537e-18	I
ENSG00000264629	AC244250.4	pri-miRNA	3.81311e-18	I
ENSG00000207833	AC244157.1	pri-miRNA	5.32949e-18	I
ENSG00000284049	miR-650	pri-miRNA	1.78281e-17	I
ENSG00000249096	RP11-290F5.1	lincRNA	3.25251e-17	I
ENSG00000240040	AC096579.13	lincRNA	7.14865e-17	I
ENSG00000224220	AC104699.1	antisense	3.62156e-15	I
ENSG00000248571	RP11-768B22.2	antisense	7.52368e-15	I
ENSG00000267074	RP11-1094M14.5	sense_intronic	1.00279e-14	I
ENSG00000223960	AC009948.5	antisense	1.20018e-14	I
ENSG00000263069	CTD-2047H16.4	antisense	2.78222e-14	I
ENSG00000229228	LINC00582	antisense	3.31907e-14	I
ENSG00000253686	LINC01484	lincRNA	4.47734e-14	I
ENSG00000258572	RP11-1070N10.3	lincRNA	1.5769e-13	I
ENSG00000224407	RP5-956O18.3	antisense	1.72056e-13	I
ENSG00000257452	RP1-71H24.1	antisense	3.0038e-13	I
ENSG00000260065	CTA-445C9.15	lincRNA	3.92438e-13	I
ENSG00000272666	CTA-384D8.35	lincRNA	4.12493e-13	I
ENSG00000175898	CTD-2369P2.2	lincRNA	4.99925e-13	I
ENSG00000262211	CTD-2031P19.5	antisense	6.759e-13	I
ENSG00000245164	LINC00861	lincRNA	8.59781e-13	I
ENSG00000251301	RP11-81H14.2	lincRNA	9.52984e-13	I
ENSG00000257181	RP11-611O2.5	antisense	1.02876e-12	I
ENSG00000248980	RP11-87F15.2	antisense	1.34379e-12	I
ENSG00000206028	CTA-373H7.7	lincRNA	1.9408e-12	I
ENSG00000225783	MIAT	lincRNA	2.28361e-12	I
ENSG00000249593	CTB-46B19.2	antisense	2.54764e-12	I
ENSG00000204277	RP11-219G17.4	lincRNA	2.82406e-12	I
ENSG00000236234	AC091132.1	antisense	3.016e-12	I
ENSG00000267576	CTC-510F12.6	sense_intronic	4.56368e-12	I
ENSG00000207830	AC244250.1	pri-miRNA	1.22174e-11	I
ENSG00000233912	AC026202.3	antisense	1.87791e-11	I
ENSG00000259772	RP11-16E12.2	lincRNA	1.92295e-11	I
ENSG00000270751	DEAR	antisense	2.37292e-11	I
ENSG00000276863	CTD-2047H16.5	antisense	2.85104e-11	I
ENSG00000258451	RP11-903H12.3	antisense	2.90278e-11	I
ENSG00000273272	CTA-384D8.34	lincRNA	3.17298e-11	I
ENSG00000253796	RP11-1084E5.1	antisense	3.46426e-11	I
ENSG00000272341	RP1-151F17.2	lincRNA	4.32951e-11	I
ENSG00000226312	CFLAR-AS1	antisense	7.87347e-11	I
ENSG00000228275	ARMCX3-AS1	antisense	1.18543e-10	I
ENSG00000268471	miR-4453	lincRNA	1.37163e-10	I
ENSG00000267607	CTD-2369P2.8	antisense	1.4348e-10	I
ENSG00000261779	RP11-69H7.3	antisense	1.43768e-10	I
ENSG00000279038	RP1-5O6.6	sense_intronic	1.46153e-10	I
ENSG00000267349	RP11-686D22.9	antisense	1.51493e-10	I
ENSG00000253607	RP11-557C18.3	antisense	2.03031e-10	I
ENSG00000186594	miR-22HG	lincRNA	3.50724e-10	I
ENSG00000230385	AC012507.4	antisense	7.63666e-10	I
ENSG00000261435	hsa-miR--1587	lincRNA	1.03104e-09	I
ENSG00000235246	RP1-5O6.5	antisense	1.03609e-09	I
ENSG00000235027	AC068580.6	antisense	1.24208e-09	I
ENSG00000233785	RP13-314C10.5	antisense	1.77729e-09	I
ENSG00000257433	RP1-197B17.3	antisense	1.91944e-09	I
ENSG00000276116	FUT8-AS1	antisense	2.70257e-09	I
ENSG00000132832	LINC01260	antisense	2.95426e-09	I
ENSG00000262454	RP11-65J21.3	lincRNA	3.18655e-09	I
ENSG00000227050	RP11-460I13.2	antisense	3.80076e-09	I
ENSG00000249474	RP11-49I4.3	antisense	4.07058e-09	I
ENSG00000261759	RP11-626G11.3	antisense	5.22436e-09	I
ENSG00000237352	RP11-145M4.3	lincRNA	6.18771e-09	I
ENSG00000236255	AC009404.2	lincRNA	6.41297e-09	I
ENSG00000231789	PIK3CD-AS2	antisense	8.45662e-09	I
ENSG00000257886	RP11-61E11.1	antisense	9.15131e-09	I
ENSG00000244676	AL109761.5	antisense	1.46722e-08	I
ENSG00000227495	AC109333.10	antisense	1.83806e-08	I
ENSG00000253214	RP11-1149M10.2	lincRNA	2.13508e-08	I
ENSG00000258177	RP11-394J1.2	antisense	2.46037e-08	I
ENSG00000254703	SENCR	antisense	3.65319e-08	I
ENSG00000272695	GAS6-AS2	lincRNA	4.04636e-08	I
ENSG00000271133	CTA-293F17.1	antisense	5.0288e-08	I
ENSG00000233108	AC006042.7	antisense	5.39494e-08	I
ENSG00000270426	RP11-326I11.5	sense_intronic	5.91317e-08	I
ENSG00000235295	FLJ41941	lincRNA	6.40077e-08	I
ENSG00000229931	RP1-151F17.1	antisense	7.04292e-08	I
ENSG00000268509	RP11-572B2.1	antisense	8.18735e-08	I
ENSG00000211517	miR-671	pri-miRNA	8.48959e-08	I
ENSG00000227484	XX-C283C717.1	antisense	8.75413e-08	I
ENSG00000263707	RP11-597M12.1	antisense	9.4734e-08	I
ENSG00000207834	AC244250.2	pri-miRNA	9.63257e-08	I
ENSG00000269460	AC093063.3	lincRNA	1.11009e-07	I
ENSG00000273824	RP11-81H14.1	lincRNA	1.11119e-07	I
ENSG00000267288	RP13-890H12.2	antisense	1.13815e-07	I
ENSG00000260361	CTD-2313J17.5	sense_intronic	1.31791e-07	I
ENSG00000253395	KB-1460A1.1	lincRNA	1.49074e-07	I
ENSG00000248243	RP11-93K22.13	lincRNA	1.50358e-07	I
ENSG00000231119	RP4-569M23.2	antisense	1.65259e-07	I
ENSG00000223685	LINC00571	lincRNA	1.69466e-07	I
ENSG00000207561	miR-635	pri-miRNA	1.80993e-07	I
ENSG00000228109	MFI2-AS1	antisense	2.04225e-07	I
ENSG00000273451	RP4-569M23.4	sense_intronic	2.18186e-07	I
ENSG00000267547	RP11-686D22.4	lincRNA	2.25452e-07	I
ENSG00000279182	XX-C00717C00720L.1	antisense	2.37364e-07	I
ENSG00000226471	CTA-292E10.6	antisense	2.60228e-07	I
ENSG00000259343	RP11-761I4.3	antisense	2.65345e-07	I
ENSG00000234546	RP3-510D11.2	lincRNA	2.67589e-07	I
ENSG00000273445	RP11-1399P15.1	antisense	3.57934e-07	I
ENSG00000230266	XXYLT1-AS2	antisense	4.04721e-07	I
ENSG00000227199	ST7-AS1	antisense	4.09894e-07	I
ENSG00000227188	RP5-1104E15.6	antisense	4.22757e-07	I
ENSG00000265451	RP11-204L24.2	antisense	4.82383e-07	I
ENSG00000249993	BFSP2-AS1	antisense	5.27232e-07	I
ENSG00000274414	RP5-965G21.4	lincRNA	6.24535e-07	I
ENSG00000243629	LINC00880	lincRNA	7.23084e-07	I
ENSG00000253390	CTC-756D1.2	lincRNA	1.02739e-06	I
ENSG00000259583	RP11-66B24.4	antisense	1.23835e-06	I
ENSG00000257052	RP11-881M11.2	antisense	1.48072e-06	I
ENSG00000263413	AL928742.1	pri-miRNA	1.4989e-06	I
ENSG00000275022	miR-6753	pri-miRNA	1.54407e-06	I
ENSG00000227227	AC017101.10	antisense	1.87101e-06	I
ENSG00000235802	HCFC1-AS1	antisense	3.39356e-06	I
ENSG00000270557	RP11-546J1.1	lincRNA	5.44509e-06	I
ENSG00000250893	RP11-588L15.2	antisense	5.48216e-06	I
ENSG00000256325	RP11-611O2.1	antisense	7.79888e-06	I
ENSG00000271774	RP4-678D15.1	antisense	7.8736e-06	I
ENSG00000274372	RP11-94I2.4	lincRNA	8.41754e-06	I
ENSG00000260755	RP11-403P17.3	lincRNA	1.48713e-05	I
ENSG00000274902	RP1-197B17.4	lincRNA	1.59367e-05	I
ENSG00000252892	RNU6-548P	snRNA	2.04991e-05	I
ENSG00000275657	miR-6758	pri-miRNA	2.25975e-05	I
ENSG00000278029	CTD-2240J17.2	lincRNA	2.34996e-05	I
ENSG00000258521	RP11-638I2.9	antisense	2.84389e-05	I
ENSG00000259514	RP11-685G9.2	antisense	3.25299e-05	I
ENSG00000261054	RP11-6O2.4	antisense	3.84329e-05	I
ENSG00000207707	miR-639	pri-miRNA	5.24741e-05	I
ENSG00000250602	RP11-517I3.1	antisense	0.000105236	I
ENSG00000181798	LINC00471	lincRNA	0.000121256	I
ENSG00000272567	RP11-73K9.3	lincRNA	0.000144611	I
ENSG00000228748	RP13-39P12.3	antisense	0.000228901	I
ENSG00000243004	AC005062.2	sense_overlapping	0.000295127	I
ENSG00000172965	miR-4435-1HG	lincRNA	7.43062e-17	II
ENSG00000222041	LINC00152	lincRNA	1.36451e-16	II
ENSG00000258377	RP11-649E7.5	antisense	2.48055e-16	II
ENSG00000256364	RP11-173P15.3	antisense	4.71277e-15	II
ENSG00000267458	CTC-425F1.4	antisense	8.99082e-15	II
ENSG00000262831	RP11-498C9.2	antisense	9.88075e-15	II
ENSG00000260466	RP4-536B24.2	antisense	2.69471e-14	II
ENSG00000256482	RP11-625L16.3	antisense	1.22282e-13	II
ENSG00000258666	RP11-638I2.8	antisense	3.53957e-13	II
ENSG00000270933	CTD-2227E11.1	lincRNA	1.06613e-12	II
ENSG00000263585	RP11-498C9.13	antisense	1.10242e-12	II
ENSG00000255114	RP11-110I1.6	antisense	1.1787e-12	II
ENSG00000275719	CTB-147N14.6	antisense	2.12494e-12	II
ENSG00000253522	miR-146A	lincRNA	2.50204e-12	II
ENSG00000260101	RP11-568N6.1	lincRNA	3.69049e-12	II
ENSG00000237054	PRMT5-AS1	antisense	1.23702e-11	II
ENSG00000268913	AC026806.2	lincRNA	1.55491e-11	II
ENSG00000207832	AC245028.1	pri-miRNA	1.61802e-11	II
ENSG00000238221	RP11-69L16.4	antisense	2.26984e-11	II
ENSG00000272405	RP11-284F21.10	antisense	2.39956e-11	II
ENSG00000254721	RP11-805J14.5	antisense	6.17944e-11	II
ENSG00000279868	RN7SL3	known_ncrna	7.27045e-11	II
ENSG00000265438	miR-4751	pri-miRNA	1.15434e-10	II
ENSG00000271857	RP1-244F24.1	antisense	2.50385e-10	II
ENSG00000272114	RP1-261G23.7	antisense	2.63093e-10	II
ENSG00000226648	PLCG1-AS1	antisense	3.26475e-10	II
ENSG00000255126	CTD-2531D15.5	antisense	4.43937e-10	II
ENSG00000230812	LINC01358	lincRNA	4.56509e-10	II
ENSG00000229953	RP11-284F21.7	antisense	4.802e-10	II
ENSG00000269919	RP1-134E15.3	sense_intronic	5.52676e-10	II
ENSG00000253633	KB-1980E6.3	lincRNA	8.24084e-10	II
ENSG00000180712	RP11-290F5.2	lincRNA	1.0161e-09	II
ENSG00000270081	RP5-935K16.1	lincRNA	1.22428e-09	II
ENSG00000260350	RP11-152P23.2	antisense	1.68729e-09	II
ENSG00000276511	miR-7703	pri-miRNA	2.5681e-09	II
ENSG00000237989	AP001046.5	lincRNA	3.15104e-09	II
ENSG00000224597	SVIL-AS1	antisense	3.43051e-09	II
ENSG00000272017	RP1-199J3.7	antisense	4.33317e-09	II
ENSG00000272563	RP11-480C16.1	lincRNA	4.36813e-09	II
ENSG00000237339	LINC01502	lincRNA	4.64216e-09	II
ENSG00000272068	RP11-284F21.9	lincRNA	4.73004e-09	II
ENSG00000207765	AL132780.1	pri-miRNA	6.39468e-09	II
ENSG00000264019	RP11-6N17.6	antisense	9.64776e-09	II
ENSG00000263470	RP11-160O5.1	lincRNA	3.16894e-08	II
ENSG00000233058	LINC00884	antisense	3.70217e-08	II
ENSG00000272468	RP1-86C11.7	lincRNA	4.01477e-08	II
ENSG00000241525	AC108004.3	antisense	5.73214e-08	II
ENSG00000262074	SNORD3B-2	lincRNA	8.31832e-08	II
ENSG00000259747	RP11-275I4.2	lincRNA	1.1164e-07	II
ENSG00000226377	AC084809.2	antisense	1.91309e-07	II
ENSG00000258761	RP11-24J19.1	antisense	2.04529e-07	II
ENSG00000167912	RP11-25K19.1	antisense	2.43336e-07	II
ENSG00000255252	RP1-65P5.3	antisense	2.6556e-07	II
ENSG00000233922	AL133493.2	lincRNA	4.92878e-07	II
ENSG00000238062	SPATA3-AS1	lincRNA	5.16009e-07	II
ENSG00000207652	miR-621	pri-miRNA	5.32963e-07	II
ENSG00000245694	CRNDE	lincRNA	5.7251e-07	II
ENSG00000253102	RP1-117B12.4	antisense	5.84826e-07	II
ENSG00000257924	RP11-493L12.5	lincRNA	9.7907e-07	II
ENSG00000205537	RP11-89H19.1	antisense	9.79991e-07	II
ENSG00000256894	RP11-283G6.3	antisense	1.22013e-06	II
ENSG00000207601	miR-611	pri-miRNA	1.98401e-06	II
ENSG00000251279	CTC-436P18.1	antisense	2.51358e-06	II
ENSG00000262420	RP11-490O6.2	antisense	2.84394e-06	II
ENSG00000236137	RP11-27K13.3	antisense	2.94958e-06	II
ENSG00000272456	CTD-2342N23.3	lincRNA	3.17545e-06	II
ENSG00000237015	CTA-984G1.5	antisense	3.64156e-06	II
ENSG00000231346	LINC01160	lincRNA	3.90083e-06	II
ENSG00000271992	RP11-42O15.3	lincRNA	4.55413e-06	II
ENSG00000266495	RP11-17J14.2	antisense	5.80541e-06	II
ENSG00000221686	AC244205.1	pri-miRNA	1.3346e-05	II
ENSG00000204581	AC096670.3	antisense	1.56447e-05	II
ENSG00000257702	LBX2-AS1	antisense	1.66953e-05	II
ENSG00000207118	SNORD14D	snoRNA	2.27091e-05	II
ENSG00000232445	RP11-132A1.4	antisense	2.591e-05	II
ENSG00000272273	XXbac-BPG252P9.10	antisense	2.89065e-05	II
ENSG00000226367	ST7-AS2	antisense	5.0503e-05	II
ENSG00000251187	CTC-459M5.2	antisense	7.34142e-05	II
ENSG00000232959	RP11-332H17.1	antisense	8.11359e-05	II
ENSG00000267735	CTD-2265O21.7	antisense	8.42789e-05	II
ENSG00000265072	miR-3652	pri-miRNA	8.69242e-05	II
ENSG00000265185	SNORD3B-1	lincRNA	0.000103785	II
ENSG00000239718	HLTF-AS1	antisense	0.000113475	II
ENSG00000265558	miR-3918	pri-miRNA	0.000138995	II
ENSG00000238365	RNU7-57P	snRNA	0.000266267	II
ENSG00000274317	RP11-93G5.1	lincRNA	0.0002788	II
ENSG00000262202	SNORD3D	lincRNA	0.00263497	II
ENSG00000225886	RP11-288L9.4	antisense	3.21569e-15	III
ENSG00000225964	NRIR	antisense	1.59343e-13	III
ENSG00000232613	AC007386.4	antisense	5.07551e-13	III
ENSG00000226751	AF127936.5	lincRNA	8.2857e-13	III
ENSG00000225205	AC093818.1	antisense	1.75167e-12	III
ENSG00000272669	RP3-508I15.21	antisense	1.30929e-11	III
ENSG00000228318	AP001610.5	antisense	2.00401e-11	III
ENSG00000277511	CTD-2095E4.5	lincRNA	3.6037e-11	III
ENSG00000205837	LINC00487	lincRNA	1.3326e-09	III
ENSG00000276343	RP1-71H24.6	lincRNA	3.07575e-09	III
ENSG00000275260	RP11-216P16.8	lincRNA	5.83164e-09	III
ENSG00000232884	AF127936.3	lincRNA	8.17686e-09	III
ENSG00000246375	RP11-10L7.1	lincRNA	8.4729e-09	III
ENSG00000260401	RP11-800A3.4	sense_overlapping	1.06856e-08	III
ENSG00000247317	RP11-273G15.2	lincRNA	1.08013e-08	III
ENSG00000251377	RP11-18H21.3	lincRNA	1.08083e-08	III
ENSG00000225075	RP11-426L16.3	antisense	2.2812e-08	III
ENSG00000254340	RP11-10A14.3	antisense	2.36884e-08	III
ENSG00000235313	HM13-IT1	sense_intronic	2.79928e-08	III
ENSG00000232855	AF131217.1	lincRNA	3.11151e-08	III
ENSG00000254211	LINC01485	lincRNA	7.36041e-08	III
ENSG00000256139	RP11-968O1.5	sense_overlapping	9.26681e-08	III
ENSG00000207835	AC244250.3	pri-miRNA	9.76591e-08	III
ENSG00000266604	RP11-856M7.6	lincRNA	1.04125e-07	III
ENSG00000230606	AC159540.1	lincRNA	2.18356e-07	III
ENSG00000224789	AC012363.4	antisense	2.26973e-07	III
ENSG00000269053	CTD-2521M24.8	antisense	3.79793e-07	III
ENSG00000249502	AC006160.5	antisense	5.40803e-07	III
ENSG00000273680	RP11-996F15.6	antisense	9.29494e-07	III
ENSG00000226155	AC124944.3	antisense	1.44439e-06	III
ENSG00000277874	RP1-197B17.6	lincRNA	2.32193e-06	III
ENSG00000229267	AC072062.1	antisense	3.78549e-06	III
ENSG00000276778	RP11-524N5.1	lincRNA	4.3662e-06	III
ENSG00000263862	LINC01543	lincRNA	5.19906e-06	III
ENSG00000146666	LINC00525	antisense	6.03975e-06	III
ENSG00000275264	miR-1204	pri-miRNA	1.37355e-05	III
ENSG00000230943	RP11-367G18.1	lincRNA	1.99669e-05	III
ENSG00000272983	RP11-508N22.12	lincRNA	2.59071e-05	III
ENSG00000247151	CSTF3-AS1	antisense	0.000307882	III
ENSG00000200469	RNU6-112P	snRNA	0.000470406	III
ENSG00000280102	RN7SL2	known_ncrna	0.000597748	III
ENSG00000258486	RN7SL1	non_coding	0.00073902	III
ENSG00000276330	AL353644.7	pri-miRNA	0.00153186	III
ENSG00000272540	XXbac-BPG252P9.9	antisense	6.13194e-18	IV
ENSG00000266077	AC139149.1	pri-miRNA	2.73321e-16	IV
ENSG00000258232	RP11-161H23.5	antisense	3.91002e-16	IV
ENSG00000258017	RP11-386G11.10	antisense	8.58348e-16	IV
ENSG00000256164	CCND2-AS1	antisense	2.32799e-15	IV
ENSG00000234961	RP11-124N14.3	antisense	4.22006e-15	IV
ENSG00000265415	CTD-2510F5.4	antisense	6.68797e-15	IV
ENSG00000249310	APOBEC3B-AS1	antisense	3.62532e-14	IV
ENSG00000261266	CTD-2196E14.5	antisense	2.48284e-13	IV
ENSG00000254027	RP11-363E6.3	antisense	3.76818e-13	IV
ENSG00000261416	RP11-455F5.5	antisense	3.99814e-13	IV
ENSG00000269968	RP5-940J5.9	antisense	7.60757e-13	IV
ENSG00000253174	RP11-360L9.7	antisense	1.10267e-12	IV
ENSG00000245322	RP11-15B17.1	antisense	2.31173e-12	IV
ENSG00000272016	RP11-215G15.5	lincRNA	2.49656e-12	IV
ENSG00000232335	RP11-435D7.3	antisense	2.94772e-12	IV
ENSG00000251018	HMMR-AS1	antisense	4.83011e-12	IV
ENSG00000258725	PRC1-AS1	antisense	1.00881e-11	IV
ENSG00000261061	RP11-303E16.2	sense_intronic	1.54341e-11	IV
ENSG00000241163	LINC00877	lincRNA	1.71348e-11	IV
ENSG00000277089	AC069363.1	antisense	4.33589e-11	IV
ENSG00000231864	RP11-229P13.23	antisense	4.96466e-11	IV
ENSG00000260874	RP11-715J22.4	lincRNA	9.88669e-11	IV
ENSG00000255276	RRM1-AS1	antisense	1.01703e-10	IV
ENSG00000233589	RP4-694A7.2	antisense	1.54944e-10	IV
ENSG00000260997	RP4-647J21.1	sense_overlapping	1.56393e-10	IV
ENSG00000270172	RP5-1024G6.8	lincRNA	3.441e-10	IV
ENSG00000258334	RP11-161H23.9	antisense	6.72686e-10	IV
ENSG00000214145	LINC00887	lincRNA	7.97809e-10	IV
ENSG00000259049	RP11-589M4.1	antisense	8.29032e-10	IV
ENSG00000267062	CTD-2659N19.10	antisense	9.47817e-10	IV
ENSG00000260213	RP11-303E16.3	antisense	1.11923e-09	IV
ENSG00000242396	RP11-67L3.5	antisense	1.22919e-09	IV
ENSG00000232803	SLCO4A1-AS1	antisense	1.23143e-09	IV
ENSG00000232828	AF196970.3	antisense	1.46415e-09	IV
ENSG00000265393	CTD-2517M22.17	antisense	1.47244e-09	IV
ENSG00000258525	RP11-829H16.3	antisense	1.64102e-09	IV
ENSG00000255857	PXN-AS1	antisense	1.69598e-09	IV
ENSG00000266088	RP5-1028K7.2	lincRNA	2.18687e-09	IV
ENSG00000250917	RP4-785G19.5	sense_overlapping	3.81016e-09	IV
ENSG00000237485	SGOL1-AS1	antisense	4.83407e-09	IV
ENSG00000261762	RP11-650L12.2	antisense	9.76374e-09	IV
ENSG00000229191	RP11-168O16.1	antisense	9.94772e-09	IV
ENSG00000276131	RP11-481J2.3	antisense	1.07697e-08	IV
ENSG00000229124	VIM-AS1	antisense	1.23842e-08	IV
ENSG00000227528	DIAPH3-AS1	antisense	1.38512e-08	IV
ENSG00000186369	LINC00643	lincRNA	2.01764e-08	IV
ENSG00000258987	RP11-131H24.4	antisense	2.18085e-08	IV
ENSG00000276008	RP11-137H15.4	lincRNA	2.24856e-08	IV
ENSG00000253133	RP11-360L9.4	antisense	3.37413e-08	IV
ENSG00000267255	CTB-50L17.5	antisense	3.7404e-08	IV
ENSG00000279762	RP11-227G15.12	antisense	4.11646e-08	IV
ENSG00000261602	CTD-2033A16.1	antisense	5.68863e-08	IV
ENSG00000229257	RP11-229P13.22	antisense	9.45748e-08	IV
ENSG00000228838	RP4-784A16.2	antisense	1.86723e-07	IV
ENSG00000244332	RP11-119K6.6	sense_overlapping	2.96668e-07	IV
ENSG00000265334	CTD-2349P21.11	antisense	3.62313e-07	IV
ENSG00000270069	miR-222HG	lincRNA	4.35145e-07	IV
ENSG00000269974	RP11-932O9.10	lincRNA	5.85734e-07	IV
ENSG00000268658	LINC00664	lincRNA	6.04871e-07	IV
ENSG00000260423	RP13-735L24.1	lincRNA	7.19503e-07	IV
ENSG00000255348	RP11-700F16.3	antisense	8.53532e-07	IV
ENSG00000233461	RP11-295G20.2	antisense	1.03362e-06	IV
ENSG00000229664	RP11-536K7.5	antisense	1.10023e-06	IV
ENSG00000274021	RP11-823E8.3	lincRNA	1.20501e-06	IV
ENSG00000273162	RP11-108L7.15	lincRNA	1.6594e-06	IV
ENSG00000218537	MIF-AS1	antisense	4.11986e-06	IV
ENSG00000259670	RP11-485O10.2	antisense	4.97627e-06	IV
ENSG00000267364	RP11-47L3.1	lincRNA	7.33404e-06	IV
ENSG00000267801	RP11-552F3.9	antisense	8.57387e-06	IV
ENSG00000226754	RP5-1024G6.5	antisense	1.43653e-05	IV
ENSG00000225938	RP4-575N6.4	antisense	1.65655e-05	IV
ENSG00000202252	SNORD14C	snoRNA	1.80345e-05	IV
ENSG00000232600	AC084125.4	antisense	2.13411e-05	IV
ENSG00000260910	LINC00565	lincRNA	3.33977e-05	IV
ENSG00000269289	CTB-92J24.3	antisense	4.30924e-05	IV
ENSG00000224905	AP001347.6	antisense	7.64187e-05	IV
ENSG00000267128	RNF157-AS1	antisense	0.000103001	IV
ENSG00000247134	RP11-11N9.4	lincRNA	0.000141211	IV
ENSG00000251602	RP11-521B24.3	antisense	0.000208792	IV
ENSG00000221062	miR-1292	pri-miRNA	0.000267468	IV
ENSG00000247982	LINC00926	lincRNA	8.70302e-18	V
ENSG00000255760	RP11-428G5.5	lincRNA	3.8395e-16	V
ENSG00000271856	LINC01215	lincRNA	3.96216e-16	V
ENSG00000232442	CTD-3184A7.4	antisense	7.4274e-16	V
ENSG00000235621	LINC00494	lincRNA	9.35305e-16	V
ENSG00000197813	CTC-301O7.4	lincRNA	1.35642e-15	V
ENSG00000230438	SERPINB9P1	lincRNA	1.41576e-15	V
ENSG00000244879	GABPB1-AS1	antisense	1.5635e-15	V
ENSG00000227039	ITGB2-AS1	antisense	4.09715e-15	V
ENSG00000251513	CTD-2215E18.1	lincRNA	4.24621e-15	V
ENSG00000223534	HLA-DQB1-AS1	antisense	4.26756e-15	V
ENSG00000264773	miR-4420	pri-miRNA	5.12479e-15	V
ENSG00000236901	miR-600HG	sense_intronic	7.41865e-15	V
ENSG00000263463	miR-378I	pri-miRNA	8.07801e-15	V
ENSG00000233016	SNHG7	antisense	1.2897e-14	V
ENSG00000248019	FAM13A-AS1	antisense	1.31769e-14	V
ENSG00000237940	AC093642.3	lincRNA	4.67035e-14	V
ENSG00000259084	RP11-1070N10.6	sense_overlapping	7.40784e-14	V
ENSG00000255847	RP11-167N4.2	antisense	9.36884e-14	V
ENSG00000251867	RP11-48B3.5	antisense	1.20388e-13	V
ENSG00000186056	MATN1-AS1	antisense	2.18544e-13	V
ENSG00000262151	RP11-876N24.2	antisense	2.64497e-13	V
ENSG00000279833	RP4-742C19.13	antisense	3.0086e-13	V
ENSG00000267731	RP11-147L13.8	lincRNA	3.04047e-13	V
ENSG00000261879	RP11-333E1.1	antisense	3.63102e-13	V
ENSG00000271913	RP1-111C20.4	antisense	4.00977e-13	V
ENSG00000255354	RP11-148O21.2	antisense	4.41648e-13	V
ENSG00000239775	AC017116.11	sense_overlapping	4.44476e-13	V
ENSG00000177410	ZFAS1	antisense	4.67089e-13	V
ENSG00000227217	RP11-367J7.3	antisense	4.67948e-13	V
ENSG00000275673	RP11-876N24.7	sense_intronic	4.92569e-13	V
ENSG00000262222	RP11-876N24.4	antisense	5.10135e-13	V
ENSG00000214900	C14orf182	lincRNA	5.43097e-13	V
ENSG00000218018	RP4-800J21.3	antisense	5.56924e-13	V
ENSG00000245869	RP11-158I9.5	antisense	7.97892e-13	V
ENSG00000278600	RP11-81A1.6	sense_intronic	1.13492e-12	V
ENSG00000242861	RP11-285F7.2	antisense	1.18359e-12	V
ENSG00000232891	RP11-136K14.1	sense_intronic	1.29355e-12	V
ENSG00000255441	CTD-2616J11.2	antisense	1.34489e-12	V
ENSG00000226455	RP3-512E2.2	antisense	1.39878e-12	V
ENSG00000235522	AC009505.2	antisense	1.53991e-12	V
ENSG00000258136	RP11-864J10.4	antisense	1.5409e-12	V
ENSG00000250850	RP11-297B17.3	antisense	2.12443e-12	V
ENSG00000259436	CTC-378H22.2	antisense	2.15567e-12	V
ENSG00000271895	RP4-635E18.8	antisense	2.23812e-12	V
ENSG00000233184	RP11-421L21.3	antisense	2.77562e-12	V
ENSG00000212066	AL645941.1	pri-miRNA	3.05307e-12	V
ENSG00000270157	RP5-894A10.6	sense_intronic	3.08261e-12	V
ENSG00000269928	RP11-849F2.8	lincRNA	3.28887e-12	V
ENSG00000237298	TTN-AS1	antisense	3.80554e-12	V
ENSG00000267787	RP11-35G9.5	antisense	4.47059e-12	V
ENSG00000260793	RP5-882C2.2	antisense	4.90263e-12	V
ENSG00000251562	MALAT1	lincRNA	4.99104e-12	V
ENSG00000276097	AC006538.8	sense_intronic	5.07625e-12	V
ENSG00000251364	CTD-2516F10.2	antisense	5.71188e-12	V
ENSG00000188825	LINC00910	lincRNA	5.81583e-12	V
ENSG00000277402	miR-6891	pri-miRNA	5.822e-12	V
ENSG00000233893	EZR-AS1	antisense	6.63098e-12	V
ENSG00000266750	miR-4645	pri-miRNA	7.01352e-12	V
ENSG00000260077	RP11-254F7.2	lincRNA	7.14313e-12	V
ENSG00000272501	XXbac-BPG299F13.17	antisense	7.17117e-12	V
ENSG00000257345	RP11-511B23.1	lincRNA	7.25617e-12	V
ENSG00000258810	RP11-219E7.1	antisense	7.33022e-12	V
ENSG00000267121	CTD-2020K17.1	antisense	7.35646e-12	V
ENSG00000246263	KB-431C1.4	antisense	8.77178e-12	V
ENSG00000271614	LINC00936	lincRNA	9.80247e-12	V
ENSG00000260686	CTB-36H16.2	sense_overlapping	1.00311e-11	V
ENSG00000260396	AC012065.7	lincRNA	1.02069e-11	V
ENSG00000242258	LINC00996	lincRNA	1.09893e-11	V
ENSG00000224137	AC079767.4	lincRNA	1.16686e-11	V
ENSG00000224610	RP11-265P11.1	lincRNA	1.27309e-11	V
ENSG00000225963	AC009950.2	antisense	1.41342e-11	V
ENSG00000258929	RP11-58E21.3	lincRNA	1.46887e-11	V
ENSG00000257878	RP11-256L6.3	antisense	1.51775e-11	V
ENSG00000224478	RP11-13P5.1	lincRNA	1.74099e-11	V
ENSG00000272316	XXbac-BPGBPG55C20.2	lincRNA	1.76179e-11	V
ENSG00000263327	TAPT1-AS1	antisense	1.76391e-11	V
ENSG00000261490	RP11-448G15.3	sense_overlapping	1.83668e-11	V
ENSG00000214797	RP11-1036E20.9	lincRNA	2.17178e-11	V
ENSG00000245904	RP11-796E2.4	antisense	2.38167e-11	V
ENSG00000273148	RP5-1068E13.7	lincRNA	2.44219e-11	V
ENSG00000258302	RP11-981P6.1	antisense	2.45703e-11	V
ENSG00000272825	LL21NC02-1C16.2	antisense	2.49382e-11	V
ENSG00000277986	U4	snRNA	2.63197e-11	V
ENSG00000272106	RP11-345P4.9	antisense	2.64205e-11	V
ENSG00000234572	AC007880.1	lincRNA	3.158e-11	V
ENSG00000259945	CTD-2012K14.3	antisense	3.22711e-11	V
ENSG00000225032	RP11-228B15.4	antisense	3.42509e-11	V
ENSG00000244161	FLNB-AS1	antisense	3.79214e-11	V
ENSG00000274134	miR-6774	pri-miRNA	3.8254e-11	V
ENSG00000274712	RP11-147L13.15	lincRNA	3.83147e-11	V
ENSG00000260006	RP11-469M7.1	lincRNA	4.10358e-11	V
ENSG00000227155	RP11-165F24.3	antisense	4.48021e-11	V
ENSG00000231721	LINC-PINT	antisense	4.72257e-11	V
ENSG00000234290	AC116366.6	antisense	4.94248e-11	V
ENSG00000238917	SNORD10	snoRNA	5.15514e-11	V
ENSG00000226200	SGMS1-AS1	antisense	5.37147e-11	V
ENSG00000269553	U62631.5	sense_intronic	5.46544e-11	V
ENSG00000272894	RP5-1159O4.1	lincRNA	5.54788e-11	V
ENSG00000273344	PAXIP1-AS1	lincRNA	5.83737e-11	V
ENSG00000234028	AC062029.1	antisense	6.01776e-11	V
ENSG00000261716	RP11-196G18.22	sense_overlapping	6.18861e-11	V
ENSG00000228878	SEPT7-AS1	lincRNA	6.49413e-11	V
ENSG00000234184	RP5-887A10.1	lincRNA	7.08253e-11	V
ENSG00000275418	RP11-126O1.6	lincRNA	7.32598e-11	V
ENSG00000264443	RP4-594I10.3	lincRNA	7.49442e-11	V
ENSG00000246982	RP1-179N16.6	antisense	7.5734e-11	V
ENSG00000274092	CTD-3203P2.3	antisense	7.66087e-11	V
ENSG00000181800	CELF2-AS1	antisense	7.893e-11	V
ENSG00000267493	CIRBP-AS1	antisense	7.95041e-11	V
ENSG00000270055	CTD-3092A11.2	sense_intronic	8.5479e-11	V
ENSG00000231113	RP3-475N16.1	antisense	8.59581e-11	V
ENSG00000266241	miR-5047	pri-miRNA	8.63003e-11	V
ENSG00000265579	RP11-713C5.1	sense_intronic	9.67497e-11	V
ENSG00000262766	RP11-196G11.4	sense_intronic	1.07326e-10	V
ENSG00000223725	AC007879.5	antisense	1.082e-10	V
ENSG00000264290	RP11-68I3.4	sense_intronic	1.08445e-10	V
ENSG00000272871	RP11-408A13.4	lincRNA	1.09047e-10	V
ENSG00000274020	LINC01138	lincRNA	1.14312e-10	V
ENSG00000278740	RP11-147L13.14	lincRNA	1.15297e-10	V
ENSG00000231611	AP006216.11	lincRNA	1.20222e-10	V
ENSG00000273449	RP11-218F10.3	lincRNA	1.23645e-10	V
ENSG00000271725	RP11-761I4.4	3prime_overlapping_ncrna	1.31992e-10	V
ENSG00000228382	ITPKB-IT1	sense_intronic	1.38237e-10	V
ENSG00000272638	GS1-114I9.1	antisense	1.46477e-10	V
ENSG00000226009	KCNIP2-AS1	antisense	1.47655e-10	V
ENSG00000273472	RP11-102N12.3	lincRNA	1.56898e-10	V
ENSG00000269688	AC008982.2	sense_intronic	1.59083e-10	V
ENSG00000273389	RP13-514E23.2	antisense	1.72138e-10	V
ENSG00000266019	miR-3609	pri-miRNA	1.78531e-10	V
ENSG00000245812	RP11-175K6.1	lincRNA	1.87376e-10	V
ENSG00000273065	RP11-58E21.5	lincRNA	1.88919e-10	V
ENSG00000253535	RP11-624C23.1	antisense	2.05343e-10	V
ENSG00000259577	RP11-430B1.2	lincRNA	2.10029e-10	V
ENSG00000260655	CTA-250D10.23	lincRNA	2.11185e-10	V
ENSG00000248175	CTC-428G20.3	lincRNA	2.28393e-10	V
ENSG00000261770	CTC-459F4.1	lincRNA	2.3986e-10	V
ENSG00000273033	RP11-67L2.2	lincRNA	2.5202e-10	V
ENSG00000266527	RP11-138P22.1	antisense	2.55563e-10	V
ENSG00000233953	AC009970.1	antisense	2.71582e-10	V
ENSG00000237513	RP11-325F22.2	lincRNA	3.05419e-10	V
ENSG00000260894	CTD-2012K14.4	antisense	3.10364e-10	V
ENSG00000263874	LINC00672	lincRNA	3.26048e-10	V
ENSG00000277476	RP11-147L13.13	lincRNA	3.28443e-10	V
ENSG00000226696	LENG8-AS1	antisense	3.57048e-10	V
ENSG00000277299	RP11-837J7.4	antisense	3.61881e-10	V
ENSG00000183250	LINC01547	lincRNA	3.77414e-10	V
ENSG00000226711	FAM66C	antisense	3.93374e-10	V
ENSG00000240219	RP11-430C7.5	lincRNA	3.93675e-10	V
ENSG00000235706	DICER1-AS1	antisense	4.08645e-10	V
ENSG00000272211	RP11-347P5.1	antisense	4.42487e-10	V
ENSG00000254693	RP11-58K22.5	antisense	4.55669e-10	V
ENSG00000223561	AC003090.1	lincRNA	4.89699e-10	V
ENSG00000280011	RP4-671O14.7	antisense	5.24061e-10	V
ENSG00000258515	RP11-203M5.7	antisense	5.30753e-10	V
ENSG00000264456	RP11-848P1.2	sense_intronic	5.38487e-10	V
ENSG00000232229	LINC00865	lincRNA	5.43191e-10	V
ENSG00000273307	RP11-58E21.7	lincRNA	5.44217e-10	V
ENSG00000271997	RP11-97O12.6	sense_intronic	5.9545e-10	V
ENSG00000272078	RP4-734G22.3	antisense	6.01223e-10	V
ENSG00000260051	LA16c-390E6.4	antisense	6.28748e-10	V
ENSG00000228784	LINC00954	lincRNA	6.79746e-10	V
ENSG00000270012	LL0XNC01-7P3.1	lincRNA	7.25258e-10	V
ENSG00000274245	RP11-357P18.2	lincRNA	7.30094e-10	V
ENSG00000259715	CTD-3110H11.1	lincRNA	7.80584e-10	V
ENSG00000254910	RP11-326C3.7	antisense	7.87729e-10	V
ENSG00000254966	RP11-1081L13.4	antisense	8.27002e-10	V
ENSG00000205056	RP11-693J15.5	lincRNA	8.43702e-10	V
ENSG00000277300	AP003041.1	pri-miRNA	9.44254e-10	V
ENSG00000267520	RP11-373L24.1	3prime_overlapping_ncrna	1.0137e-09	V
ENSG00000238057	ZEB2-AS1	antisense	1.0396e-09	V
ENSG00000260563	RP13-516M14.1	lincRNA	1.1293e-09	V
ENSG00000272072	CTA-363E19.2	antisense	1.20521e-09	V
ENSG00000259884	RP11-1100L3.8	lincRNA	1.27524e-09	V
ENSG00000273373	RP5-1074L1.4	antisense	1.31857e-09	V
ENSG00000262319	CTC-457L16.2	antisense	1.40258e-09	V
ENSG00000259976	RP11-553L6.5	lincRNA	1.43912e-09	V
ENSG00000272764	RP11-318E3.9	lincRNA	1.45995e-09	V
ENSG00000254815	RP11-496I9.1	antisense	1.49479e-09	V
ENSG00000263397	miR-5196	pri-miRNA	1.51269e-09	V
ENSG00000226571	RP11-445F6.2	antisense	1.51587e-09	V
ENSG00000261662	RP5-1042I8.7	sense_overlapping	1.56141e-09	V
ENSG00000277192	RP11-89G4.1	antisense	1.57304e-09	V
ENSG00000251136	RP11-37B2.1	lincRNA	1.62575e-09	V
ENSG00000200530	SNORD35B	snoRNA	1.63038e-09	V
ENSG00000272034	SNORD14A	snoRNA	1.72743e-09	V
ENSG00000225792	AC004540.4	antisense	1.73885e-09	V
ENSG00000269290	RP11-869B15.1	lincRNA	1.74336e-09	V
ENSG00000274561	RP11-147L13.12	lincRNA	1.77012e-09	V
ENSG00000166770	ZNF667-AS1	lincRNA	1.79397e-09	V
ENSG00000229647	AC007879.7	lincRNA	2.19738e-09	V
ENSG00000270060	RP11-390K5.6	sense_intronic	2.20081e-09	V
ENSG00000215068	AC025171.1	antisense	2.24408e-09	V
ENSG00000259658	RP11-89K11.1	lincRNA	2.29632e-09	V
ENSG00000248309	MEF2C-AS1	antisense	2.32999e-09	V
ENSG00000212607	SNORA45B	snoRNA	2.3513e-09	V
ENSG00000267416	CTD-2319I12.2	lincRNA	2.38441e-09	V
ENSG00000273419	RP4-751H13.7	antisense	2.39497e-09	V
ENSG00000267454	ZNF582-AS1	lincRNA	2.45166e-09	V
ENSG00000200418	SNORA63	snoRNA	2.5643e-09	V
ENSG00000234902	AC007879.2	lincRNA	2.57287e-09	V
ENSG00000245080	RP11-320N21.1	antisense	2.62691e-09	V
ENSG00000221420	SNORA81	snoRNA	2.67281e-09	V
ENSG00000263391	AL512428.1	pri-miRNA	2.73412e-09	V
ENSG00000271730	RP11-787I22.3	antisense	2.8049e-09	V
ENSG00000228590	AC007381.3	lincRNA	2.94085e-09	V
ENSG00000244158	RP1-93H18.6	antisense	2.95398e-09	V
ENSG00000276523	RP11-490B18.6	antisense	2.97836e-09	V
ENSG00000278831	RP11-12J10.4	antisense	3.0533e-09	V
ENSG00000273062	RP11-428K3.1	antisense	3.15909e-09	V
ENSG00000277985	SNORA67	snoRNA	3.17491e-09	V
ENSG00000182873	RP11-181G12.2	antisense	3.21744e-09	V
ENSG00000261468	RP11-1024P17.1	sense_overlapping	3.27239e-09	V
ENSG00000228839	PIK3IP1-AS1	antisense	3.28113e-09	V
ENSG00000261644	RP11-327F22.2	antisense	3.33224e-09	V
ENSG00000250366	TUNAR	lincRNA	3.36585e-09	V
ENSG00000274536	miR-223	antisense	3.42979e-09	V
ENSG00000200259	SNORD35A	snoRNA	3.46853e-09	V
ENSG00000240710	RP11-430C7.4	antisense	3.48632e-09	V
ENSG00000225914	XXbac-BPG154L12.4	antisense	3.53576e-09	V
ENSG00000279210	RP4-593C16.4	antisense	3.6012e-09	V
ENSG00000276603	RP11-425M5.7	sense_intronic	3.63035e-09	V
ENSG00000257151	PWAR6	lincRNA	3.72327e-09	V
ENSG00000255320	RP11-755F10.1	antisense	3.72904e-09	V
ENSG00000253982	CTD-2336O2.1	antisense	3.77352e-09	V
ENSG00000207031	SNORD59A	snoRNA	3.85833e-09	V
ENSG00000266347	AC068641.1	pri-miRNA	4.10889e-09	V
ENSG00000233255	AC019181.2	antisense	4.11213e-09	V
ENSG00000229047	AF127577.10	antisense	4.19853e-09	V
ENSG00000278527	SNORD22	snoRNA	4.34522e-09	V
ENSG00000263847	RP11-143J12.3	antisense	4.42778e-09	V
ENSG00000235978	AC018816.3	antisense	4.47036e-09	V
ENSG00000225302	RP11-539I5.1	antisense	4.49857e-09	V
ENSG00000259891	CTA-204B4.2	antisense	4.72282e-09	V
ENSG00000276136	RP11-50I19.2	lincRNA	4.80828e-09	V
ENSG00000228962	HCG23	antisense	4.84756e-09	V
ENSG00000230489	VAV3-AS1	antisense	5.36621e-09	V
ENSG00000258504	RP11-638I2.6	lincRNA	5.52073e-09	V
ENSG00000207500	SNORD102	snoRNA	5.91933e-09	V
ENSG00000223511	RP13-297E16.4	lincRNA	5.99504e-09	V
ENSG00000228486	LINC01125	antisense	6.0405e-09	V
ENSG00000231064	RP11-263K19.4	antisense	6.19496e-09	V
ENSG00000269086	CTC-523E23.5	lincRNA	6.34965e-09	V
ENSG00000271109	CTC-523E23.11	lincRNA	6.90126e-09	V
ENSG00000241666	RP3-455J7.4	antisense	6.92035e-09	V
ENSG00000255518	RP11-148O21.4	antisense	7.12744e-09	V
ENSG00000209582	SNORA48	snoRNA	7.30067e-09	V
ENSG00000243305	RP11-362A9.3	antisense	7.44191e-09	V
ENSG00000260966	RP11-690D19.3	sense_overlapping	7.48158e-09	V
ENSG00000267571	AC104532.4	antisense	7.56426e-09	V
ENSG00000248544	CTB-47B11.3	antisense	7.80125e-09	V
ENSG00000266053	NDUFV2-AS1	antisense	7.89256e-09	V
ENSG00000271858	CYB561D2	antisense	8.42036e-09	V
ENSG00000174171	RP11-23P13.6	antisense	8.48394e-09	V
ENSG00000269929	RP11-2B6.2	lincRNA	8.53008e-09	V
ENSG00000254760	CTD-2616J11.3	antisense	8.58717e-09	V
ENSG00000232874	RP11-135A1.2	antisense	9.82932e-09	V
ENSG00000225434	LINC01504	lincRNA	1.01035e-08	V
ENSG00000226029	RP4-798A10.2	lincRNA	1.03866e-08	V
ENSG00000231439	WASIR2	lincRNA	1.04215e-08	V
ENSG00000274265	CH17-189H20.1	lincRNA	1.04532e-08	V
ENSG00000177337	DLGAP1-AS1	antisense	1.09327e-08	V
ENSG00000252061	RNU6-415P	snRNA	1.11069e-08	V
ENSG00000248445	SEMA6A-AS1	antisense	1.14277e-08	V
ENSG00000261474	RP11-452L6.1	lincRNA	1.14741e-08	V
ENSG00000222365	SNORD12B	snoRNA	1.14865e-08	V
ENSG00000265073	AC010761.6	antisense	1.17525e-08	V
ENSG00000272931	RP5-943J3.2	lincRNA	1.18953e-08	V
ENSG00000259004	RP11-8L8.2	lincRNA	1.20585e-08	V
ENSG00000272927	RP11-1191J2.5	antisense	1.21739e-08	V
ENSG00000228835	AC012123.1	antisense	1.21748e-08	V
ENSG00000244203	FOXP1-AS1	antisense	1.28441e-08	V
ENSG00000235703	LINC00894	antisense	1.28592e-08	V
ENSG00000228393	LINC01004	antisense	1.3483e-08	V
ENSG00000232490	OSBPL10-AS1	antisense	1.35625e-08	V
ENSG00000254162	RP11-48B3.3	lincRNA	1.41848e-08	V
ENSG00000234936	AC010883.5	antisense	1.42912e-08	V
ENSG00000236977	ANKRD44-IT1	sense_intronic	1.44948e-08	V
ENSG00000270100	RP11-130L8.1	lincRNA	1.46586e-08	V
ENSG00000264918	AC005229.1	pri-miRNA	1.47546e-08	V
ENSG00000255240	RP11-142C4.6	antisense	1.47731e-08	V
ENSG00000266002	RP11-567L7.5	antisense	1.5559e-08	V
ENSG00000262001	DLGAP1-AS2	antisense	1.56102e-08	V
ENSG00000246090	RP11-696N14.1	antisense	1.58591e-08	V
ENSG00000245556	SCAMP1-AS1	lincRNA	1.62647e-08	V
ENSG00000254777	AC022182.1	lincRNA	1.68228e-08	V
ENSG00000269951	RP11-797A18.6	sense_intronic	1.83014e-08	V
ENSG00000257764	RP11-1143G9.4	antisense	1.87881e-08	V
ENSG00000177112	MRVI1-AS1	antisense	1.90528e-08	V
ENSG00000273265	RP11-353K11.1	lincRNA	1.98066e-08	V
ENSG00000230565	ZNF32-AS2	antisense	1.99531e-08	V
ENSG00000256582	RP11-75L1.1	lincRNA	2.00104e-08	V
ENSG00000255856	RP11-87C12.5	lincRNA	2.09e-08	V
ENSG00000260461	RP11-541N10.3	sense_overlapping	2.13487e-08	V
ENSG00000270062	RP11-248J18.3	sense_intronic	2.16002e-08	V
ENSG00000261131	RP11-93O14.2	sense_intronic	2.19577e-08	V
ENSG00000257497	RP11-585P4.5	antisense	2.29347e-08	V
ENSG00000272732	RP5-1159O4.2	lincRNA	2.34854e-08	V
ENSG00000245552	RP11-712B9.2	antisense	2.59939e-08	V
ENSG00000267892	CTD-2540F13.2	antisense	2.68182e-08	V
ENSG00000207603	miR-7-1	pri-miRNA	2.69781e-08	V
ENSG00000273384	RP5-1098D14.1	lincRNA	2.71814e-08	V
ENSG00000235688	AC116614.1	antisense	2.80609e-08	V
ENSG00000230262	miR-LET7DHG	lincRNA	2.80644e-08	V
ENSG00000273729	RP11-7F17.8	antisense	2.8802e-08	V
ENSG00000238063	RP11-329N22.1	lincRNA	2.8863e-08	V
ENSG00000259953	RP11-4O1.2	sense_overlapping	2.89776e-08	V
ENSG00000260231	JHDM1D-AS1	antisense	2.92192e-08	V
ENSG00000200983	SNORA45A	snoRNA	2.92302e-08	V
ENSG00000198106	SNX29P2	lincRNA	2.99644e-08	V
ENSG00000230138	RP11-117D22.2	lincRNA	3.02554e-08	V
ENSG00000273837	LLNLR-470E3.1	sense_intronic	3.09834e-08	V
ENSG00000251660	AC007036.5	sense_overlapping	3.15096e-08	V
ENSG00000206760	SNORA6	snoRNA	3.22481e-08	V
ENSG00000255421	CTD-2011F17.2	antisense	3.29268e-08	V
ENSG00000267141	CTB-31O20.8	antisense	3.43355e-08	V
ENSG00000274998	SNORA17	snoRNA	3.45335e-08	V
ENSG00000227695	DNMBP-AS1	antisense	3.82832e-08	V
ENSG00000249234	RP11-452J21.2	antisense	3.93628e-08	V
ENSG00000251323	RP11-452H21.4	lincRNA	4.31134e-08	V
ENSG00000231154	MORF4L2-AS1	antisense	4.4242e-08	V
ENSG00000271670	RP11-95I16.4	antisense	4.45032e-08	V
ENSG00000269966	RP3-331H24.5	lincRNA	4.59319e-08	V
ENSG00000228485	GRK5-IT1	sense_intronic	4.6134e-08	V
ENSG00000238142	RP11-108M9.4	lincRNA	4.62199e-08	V
ENSG00000277687	RP11-427L15.2	sense_intronic	4.64308e-08	V
ENSG00000273271	AP000254.8	antisense	4.8266e-08	V
ENSG00000263400	TMEM220-AS1	antisense	5.13103e-08	V
ENSG00000272993	RP11-196G18.24	lincRNA	5.20878e-08	V
ENSG00000254676	RP11-727A23.4	sense_overlapping	5.54283e-08	V
ENSG00000276853	RP11-305O6.4	sense_intronic	5.54463e-08	V
ENSG00000260948	RP11-552M11.8	sense_overlapping	5.64391e-08	V
ENSG00000223929	AC007381.2	lincRNA	5.74302e-08	V
ENSG00000207051	SNORA27	snoRNA	5.77461e-08	V
ENSG00000235245	RP11-122K13.12	antisense	5.88643e-08	V
ENSG00000270179	RP11-159N11.4	sense_intronic	6.09057e-08	V
ENSG00000227508	FLJ38122	lincRNA	6.15732e-08	V
ENSG00000272760	RP11-5C23.1	antisense	6.58275e-08	V
ENSG00000268947	AD000684.2	sense_intronic	6.60182e-08	V
ENSG00000275549	C9orf173-AS1	antisense	6.80662e-08	V
ENSG00000267325	LINC01415	lincRNA	6.92653e-08	V
ENSG00000199370	U3	snoRNA	7.12998e-08	V
ENSG00000240440	AC007879.3	lincRNA	7.25577e-08	V
ENSG00000266913	CTC-548K16.2	lincRNA	7.31999e-08	V
ENSG00000272462	U91328.19	lincRNA	7.88747e-08	V
ENSG00000261731	CTD-2358C21.4	antisense	8.01501e-08	V
ENSG00000265625	RP11-68I3.11	sense_intronic	8.1302e-08	V
ENSG00000266904	LINC00663	lincRNA	8.16517e-08	V
ENSG00000278376	RP11-158I9.8	lincRNA	8.17139e-08	V
ENSG00000248367	CTB-129O4.1	antisense	8.17546e-08	V
ENSG00000245466	CTD-2540L5.6	lincRNA	8.54967e-08	V
ENSG00000275996	SNORD27	snoRNA	8.66236e-08	V
ENSG00000272155	RP11-707M3.3	antisense	8.74629e-08	V
ENSG00000271787	RP11-254F7.3	antisense	8.78249e-08	V
ENSG00000264109	miR-4712	pri-miRNA	8.93483e-08	V
ENSG00000270959	LPP-AS2	antisense	9.1511e-08	V
ENSG00000272065	U91328.20	lincRNA	9.16527e-08	V
ENSG00000250906	RP11-632F7.3	antisense	9.27427e-08	V
ENSG00000255092	RP11-58K22.4	antisense	9.34111e-08	V
ENSG00000231663	RP5-827C21.4	antisense	9.44981e-08	V
ENSG00000272091	RP4-758J24.5	lincRNA	9.46766e-08	V
ENSG00000231616	RP11-575L7.4	antisense	9.76423e-08	V
ENSG00000207280	SNORD20	snoRNA	1.00523e-07	V
ENSG00000226067	LINC00869	lincRNA	1.11862e-07	V
ENSG00000231393	RP11-331F9.3	antisense	1.16275e-07	V
ENSG00000267058	RP11-15A1.3	lincRNA	1.20715e-07	V
ENSG00000228403	RP11-563N6.6	sense_intronic	1.22162e-07	V
ENSG00000258733	CTD-2341M24.1	lincRNA	1.2298e-07	V
ENSG00000275056	RP11-127I20.8	sense_intronic	1.27267e-07	V
ENSG00000272195	RP11-156E8.1	antisense	1.274e-07	V
ENSG00000223336	RNU2-6P	snRNA	1.28606e-07	V
ENSG00000199574	SNORD18C	snoRNA	1.30216e-07	V
ENSG00000260317	RP11-48B3.4	lincRNA	1.30844e-07	V
ENSG00000216863	LY86-AS1	antisense	1.34156e-07	V
ENSG00000268499	CTB-102L5.8	sense_intronic	1.38837e-07	V
ENSG00000267096	CTD-2537I9.13	sense_intronic	1.40187e-07	V
ENSG00000206885	SNORA75	snoRNA	1.42153e-07	V
ENSG00000255882	RP11-290C10.1	antisense	1.43207e-07	V
ENSG00000225342	AC079630.4	antisense	1.53533e-07	V
ENSG00000265874	miR-4489	pri-miRNA	1.54409e-07	V
ENSG00000241490	RP11-553L6.2	antisense	1.62534e-07	V
ENSG00000256128	LINC00944	lincRNA	1.63041e-07	V
ENSG00000267560	RP11-173A16.1	antisense	1.69451e-07	V
ENSG00000234793	AC114730.7	antisense	1.77061e-07	V
ENSG00000273338	RP11-386I14.4	antisense	1.88517e-07	V
ENSG00000274325	miR-600	pri-miRNA	1.98275e-07	V
ENSG00000268804	RP11-542M13.3	lincRNA	2.0182e-07	V
ENSG00000264991	AP001205.1	pri-miRNA	2.06022e-07	V
ENSG00000202363	SNORA62	snoRNA	2.091e-07	V
ENSG00000207496	SNORA7A	snoRNA	2.0969e-07	V
ENSG00000272486	RP11-532M24.1	antisense	2.11844e-07	V
ENSG00000261996	CTC-281F24.1	lincRNA	2.12083e-07	V
ENSG00000201675	SNORD32A	snoRNA	2.1492e-07	V
ENSG00000250831	CTD-2232E5.2	lincRNA	2.28324e-07	V
ENSG00000256742	RP13-941N14.1	lincRNA	2.32183e-07	V
ENSG00000270871	AC015849.19	antisense	2.40802e-07	V
ENSG00000223946	RP11-533O20.2	lincRNA	2.49026e-07	V
ENSG00000257275	RP11-164H13.1	antisense	2.50442e-07	V
ENSG00000231551	RP11-495P10.1	lincRNA	2.50996e-07	V
ENSG00000232358	RP5-955M13.4	antisense	2.5255e-07	V
ENSG00000206762	RNU6-418P	snRNA	2.53262e-07	V
ENSG00000255389	TRAF3IP2-AS1	antisense	2.84754e-07	V
ENSG00000201403	SNORD14B	snoRNA	2.88941e-07	V
ENSG00000267546	RP11-666A8.8	antisense	3.12028e-07	V
ENSG00000227945	RP11-103C16.2	antisense	3.14247e-07	V
ENSG00000272264	RP11-92K15.3	lincRNA	3.16456e-07	V
ENSG00000271032	CTD-2527I21.14	antisense	3.21268e-07	V
ENSG00000255197	RP11-750H9.5	antisense	3.36239e-07	V
ENSG00000237489	LINC00959	lincRNA	3.3935e-07	V
ENSG00000268049	CTD-2619J13.9	antisense	3.51904e-07	V
ENSG00000201785	SNORD117	snoRNA	3.52472e-07	V
ENSG00000226877	RP11-575L7.2	antisense	3.58391e-07	V
ENSG00000252206	RNU7-40P	snRNA	3.70666e-07	V
ENSG00000202314	SNORD6	snoRNA	3.79489e-07	V
ENSG00000249604	RP11-286E11.2	antisense	3.84778e-07	V
ENSG00000269890	RP5-1139B12.2	antisense	4.02344e-07	V
ENSG00000243410	RP11-245J9.4	antisense	4.08215e-07	V
ENSG00000272593	URM1	lincRNA	4.13009e-07	V
ENSG00000221500	SNORD100	snoRNA	4.55314e-07	V
ENSG00000275994	SNORA24	snoRNA	4.71571e-07	V
ENSG00000261396	CTD-2012K14.2	antisense	4.75627e-07	V
ENSG00000256661	A2ML1-AS1	antisense	4.83149e-07	V
ENSG00000207636	miR-631	pri-miRNA	4.9664e-07	V
ENSG00000277595	RP11-946P6.6	sense_intronic	5.05223e-07	V
ENSG00000262039	RP11-81K2.1	antisense	5.09337e-07	V
ENSG00000278743	RP11-707G18.1	lincRNA	5.40679e-07	V
ENSG00000249476	CTD-2587M2.1	lincRNA	5.57931e-07	V
ENSG00000270574	RP11-171I2.2	antisense	5.6639e-07	V
ENSG00000253320	KB-1507C5.2	antisense	5.92659e-07	V
ENSG00000239219	RP11-379K17.4	antisense	5.97947e-07	V
ENSG00000234336	JAZF1-AS1	antisense	6.22849e-07	V
ENSG00000260398	RP11-594N15.3	sense_overlapping	6.54239e-07	V
ENSG00000228487	RP13-225O21.2	antisense	6.619e-07	V
ENSG00000272761	LINC01279	lincRNA	6.61932e-07	V
ENSG00000265080	miR-4800	pri-miRNA	6.63323e-07	V
ENSG00000208028	miR-616	pri-miRNA	6.75253e-07	V
ENSG00000250303	RP11-356J5.12	lincRNA	6.95533e-07	V
ENSG00000266154	miR-4658	pri-miRNA	7.10727e-07	V
ENSG00000251661	RP11-326C3.11	antisense	7.13261e-07	V
ENSG00000252481	SCARNA13	snoRNA	7.53173e-07	V
ENSG00000252558	RNU6-914P	snRNA	7.63054e-07	V
ENSG00000254317	RP11-473O4.5	antisense	8.359e-07	V
ENSG00000272240	RP5-855D21.1	antisense	8.63713e-07	V
ENSG00000200534	SNORA33	snoRNA	9.28139e-07	V
ENSG00000270562	RP11-154H23.3	lincRNA	9.31489e-07	V
ENSG00000274373	RP13-714J12.1	lincRNA	9.71375e-07	V
ENSG00000236514	RP11-162G10.5	antisense	9.75355e-07	V
ENSG00000280156	AC006548.28	sense_overlapping	1.02288e-06	V
ENSG00000230113	AC091177.1	antisense	1.04045e-06	V
ENSG00000250659	RP11-864I4.3	antisense	1.04238e-06	V
ENSG00000225039	LINC01058	lincRNA	1.05044e-06	V
ENSG00000259143	CTD-2240H23.2	sense_overlapping	1.0941e-06	V
ENSG00000238033	AC002480.2	lincRNA	1.11353e-06	V
ENSG00000202503	SNORD34	snoRNA	1.11381e-06	V
ENSG00000199133	miR-LET7D	pri-miRNA	1.14286e-06	V
ENSG00000277130	RP11-530C5.4	sense_intronic	1.16828e-06	V
ENSG00000258946	RP11-58E21.4	lincRNA	1.18401e-06	V
ENSG00000222937	SNORD63	snoRNA	1.19171e-06	V
ENSG00000197182	miR-LET7BHG	lincRNA	1.20794e-06	V
ENSG00000234484	RP1-55C23.7	antisense	1.27444e-06	V
ENSG00000221743	Z95152.1	pri-miRNA	1.28883e-06	V
ENSG00000274105	RP11-278C7.3	sense_intronic	1.29644e-06	V
ENSG00000207405	SNORA64	snoRNA	1.33159e-06	V
ENSG00000253891	RP11-203E8.1	lincRNA	1.33416e-06	V
ENSG00000267309	CTD-2630F21.1	antisense	1.34004e-06	V
ENSG00000234705	HMGA1P4	antisense	1.38412e-06	V
ENSG00000273885	snoU2-30	snoRNA	1.41466e-06	V
ENSG00000270277	RP11-65L3.2	antisense	1.43265e-06	V
ENSG00000272156	RP11-477N3.1	lincRNA	1.44032e-06	V
ENSG00000249684	RP11-423H2.3	antisense	1.48139e-06	V
ENSG00000264937	AC100830.5	antisense	1.52417e-06	V
ENSG00000257135	RP11-320M2.1	lincRNA	1.56826e-06	V
ENSG00000200084	SNORD68	snoRNA	1.68337e-06	V
ENSG00000269886	RP11-266J6.2	antisense	1.698e-06	V
ENSG00000205930	C21orf62-AS1	lincRNA	1.73959e-06	V
ENSG00000247324	RP11-510M2.2	antisense	1.91713e-06	V
ENSG00000250673	RP11-6L6.2	lincRNA	1.93871e-06	V
ENSG00000267769	CTB-50L17.9	antisense	1.96959e-06	V
ENSG00000273196	RP11-717A5.2	antisense	1.97268e-06	V
ENSG00000272053	RP11-367G6.3	lincRNA	1.9757e-06	V
ENSG00000231587	SNORD62B	snoRNA	2.01019e-06	V
ENSG00000224468	RP11-181K3.4	antisense	2.03184e-06	V
ENSG00000230393	AC092667.2	antisense	2.05659e-06	V
ENSG00000265100	RP11-147L13.2	antisense	2.06632e-06	V
ENSG00000202031	SNORD38A	snoRNA	2.07948e-06	V
ENSG00000258809	CTD-2555O16.1	lincRNA	2.15852e-06	V
ENSG00000260306	RP11-645C24.5	lincRNA	2.17357e-06	V
ENSG00000270589	RP11-348N5.7	antisense	2.30261e-06	V
ENSG00000258623	CTD-2325P2.3	antisense	2.34074e-06	V
ENSG00000225541	AC002480.5	sense_overlapping	2.39651e-06	V
ENSG00000230415	RP5-902P8.10	lincRNA	2.64373e-06	V
ENSG00000270956	RP11-65L3.4	antisense	2.7397e-06	V
ENSG00000248714	RP11-1079K10.3	lincRNA	2.93188e-06	V
ENSG00000260992	DOCK9-AS2	antisense	2.99532e-06	V
ENSG00000277007	RP11-392O17.2	lincRNA	3.01631e-06	V
ENSG00000254419	RP11-261P9.4	sense_intronic	3.13354e-06	V
ENSG00000202093	SNORD58C	snoRNA	3.1346e-06	V
ENSG00000226599	RP11-136K14.3	lincRNA	3.16583e-06	V
ENSG00000260526	RP11-73K9.2	antisense	3.17801e-06	V
ENSG00000269191	AC005387.2	antisense	3.21097e-06	V
ENSG00000224875	AC083949.1	antisense	3.40652e-06	V
ENSG00000212304	SNORD12	snoRNA	3.41007e-06	V
ENSG00000273284	RP11-888D10.4	sense_intronic	3.53097e-06	V
ENSG00000253389	RP11-930P14.1	antisense	3.54562e-06	V
ENSG00000255328	RP11-326C3.12	lincRNA	3.71243e-06	V
ENSG00000206948	SNORA36A	snoRNA	3.8913e-06	V
ENSG00000271366	AC002128.5	antisense	3.90613e-06	V
ENSG00000272009	RP1-313I6.12	antisense	3.9111e-06	V
ENSG00000266459	miR-4724	pri-miRNA	4.18923e-06	V
ENSG00000274987	RP11-295I5.3	antisense	4.36415e-06	V
ENSG00000235897	TM4SF19-AS1	antisense	4.49808e-06	V
ENSG00000236337	FMR1-IT1	sense_intronic	4.5146e-06	V
ENSG00000265967	AC100830.4	antisense	4.52714e-06	V
ENSG00000271347	RP11-701H24.7	sense_intronic	4.56068e-06	V
ENSG00000276148	RP11-278C7.4	antisense	4.8246e-06	V
ENSG00000259652	RP11-797A18.3	lincRNA	5.01995e-06	V
ENSG00000268204	CTD-3214H19.6	antisense	5.14576e-06	V
ENSG00000239911	PRKAG2-AS1	antisense	5.48895e-06	V
ENSG00000263393	RP11-53I6.4	antisense	5.92153e-06	V
ENSG00000238741	SCARNA7	snoRNA	5.96782e-06	V
ENSG00000260886	RP11-432I5.1	antisense	6.06728e-06	V
ENSG00000262884	CTD-3060P21.1	antisense	6.08659e-06	V
ENSG00000274104	CTD-2553L13.10	lincRNA	6.08952e-06	V
ENSG00000232342	RP11-46O21.2	antisense	6.22703e-06	V
ENSG00000251414	RP11-843P14.1	antisense	6.26835e-06	V
ENSG00000236194	AC003104.1	sense_intronic	6.34122e-06	V
ENSG00000252835	SCARNA21	snoRNA	6.44032e-06	V
ENSG00000276161	SNORA43	snoRNA	6.49121e-06	V
ENSG00000271141	RP11-171I2.4	lincRNA	6.52726e-06	V
ENSG00000251432	RP11-420A23.1	lincRNA	6.86239e-06	V
ENSG00000275638	RP11-16E23.5	antisense	6.93394e-06	V
ENSG00000234252	AC007308.6	antisense	7.00676e-06	V
ENSG00000269843	CTC-490E21.10	lincRNA	7.14318e-06	V
ENSG00000229728	RP11-314N13.3	antisense	7.43936e-06	V
ENSG00000275557	RP11-353N4.6	lincRNA	7.69656e-06	V
ENSG00000231865	SIK3-IT1	sense_intronic	8.4798e-06	V
ENSG00000259363	CTD-2054N24.2	lincRNA	8.4804e-06	V
ENSG00000205959	RP11-689P11.2	lincRNA	8.68076e-06	V
ENSG00000258344	RP11-968A15.8	sense_overlapping	8.84545e-06	V
ENSG00000253924	RP11-1023P17.2	lincRNA	8.97501e-06	V
ENSG00000255125	SNORD97	antisense	9.04304e-06	V
ENSG00000231856	RP11-327P2.5	antisense	9.111e-06	V
ENSG00000207457	RNU6-476P	snRNA	9.14085e-06	V
ENSG00000278126	RP11-454E5.4	sense_intronic	9.38446e-06	V
ENSG00000237753	FLJ42351	lincRNA	9.39165e-06	V
ENSG00000254325	RP11-318K15.2	sense_intronic	1.01163e-05	V
ENSG00000261008	AC004158.2	lincRNA	1.01797e-05	V
ENSG00000271576	RP11-486G15.2	lincRNA	1.01871e-05	V
ENSG00000256705	CTD-2017C7.1	antisense	1.03519e-05	V
ENSG00000207631	miR-641	pri-miRNA	1.03595e-05	V
ENSG00000237638	AC007386.2	lincRNA	1.0397e-05	V
ENSG00000278356	RP11-372B4.3	sense_intronic	1.10819e-05	V
ENSG00000266844	RP11-862L9.3	antisense	1.18691e-05	V
ENSG00000272402	RP1-30M3.6	antisense	1.20267e-05	V
ENSG00000267033	CTD-2562J15.4	antisense	1.28696e-05	V
ENSG00000273356	RP11-804H8.6	lincRNA	1.29574e-05	V
ENSG00000254577	RP11-484D2.4	sense_overlapping	1.33003e-05	V
ENSG00000267026	RP11-92C4.3	antisense	1.36238e-05	V
ENSG00000206602	SNORD58A	snoRNA	1.37001e-05	V
ENSG00000227051	C14orf132	lincRNA	1.39505e-05	V
ENSG00000236559	RP11-243J16.7	antisense	1.50356e-05	V
ENSG00000270659	RP11-105N14.1	lincRNA	1.50741e-05	V
ENSG00000207067	SNORA72	snoRNA	1.53782e-05	V
ENSG00000214999	AC129492.6	antisense	1.54033e-05	V
ENSG00000256875	RP11-503G7.2	lincRNA	1.5744e-05	V
ENSG00000246627	CACNA1C-AS1	antisense	1.57941e-05	V
ENSG00000277548	RP11-139H15.6	sense_intronic	1.65482e-05	V
ENSG00000269696	AC007228.11	antisense	1.6889e-05	V
ENSG00000273156	RP11-127B20.2	lincRNA	1.72425e-05	V
ENSG00000232682	RP11-388P9.2	antisense	1.7739e-05	V
ENSG00000207241	SNORD45A	snoRNA	1.78934e-05	V
ENSG00000207547	miR-25	pri-miRNA	1.83529e-05	V
ENSG00000235052	RP1-150O5.3	lincRNA	1.86812e-05	V
ENSG00000262155	RP11-266L9.5	lincRNA	1.8838e-05	V
ENSG00000239453	SIDT1-AS1	antisense	2.07772e-05	V
ENSG00000268518	CTD-2545M3.8	lincRNA	2.2297e-05	V
ENSG00000247934	RP11-967K21.1	antisense	2.4873e-05	V
ENSG00000238622	SNORD97	snoRNA	2.48755e-05	V
ENSG00000252498	RNU6-1016P	snRNA	2.57572e-05	V
ENSG00000235499	AC073046.25	lincRNA	2.70063e-05	V
ENSG00000278330	RP11-4B16.4	antisense	2.77316e-05	V
ENSG00000256072	RP11-335I12.2	antisense	2.80508e-05	V
ENSG00000274124	RP11-474C8.8	antisense	2.90213e-05	V
ENSG00000272505	RP11-981G7.6	lincRNA	3.04474e-05	V
ENSG00000271843	RP11-245J9.5	lincRNA	3.04624e-05	V
ENSG00000269202	RP4-614O4.12	lincRNA	3.62725e-05	V
ENSG00000273402	RP5-855D21.2	antisense	3.6733e-05	V
ENSG00000245017	RP11-181C3.1	lincRNA	3.70012e-05	V
ENSG00000228107	AP000692.9	sense_overlapping	3.77384e-05	V
ENSG00000228623	ZNF883	lincRNA	4.08244e-05	V
ENSG00000272562	RP11-396C23.4	antisense	4.13902e-05	V
ENSG00000256633	RP11-169D4.2	antisense	4.47332e-05	V
ENSG00000261707	RP11-264M12.2	antisense	4.5022e-05	V
ENSG00000240373	SEC62-AS1	antisense	4.61271e-05	V
ENSG00000260022	LA16c-306A4.1	antisense	4.76536e-05	V
ENSG00000225331	AP001055.6	lincRNA	4.81729e-05	V
ENSG00000228906	RP13-216E22.4	lincRNA	5.22101e-05	V
ENSG00000252139	SCARNA18	snoRNA	5.30724e-05	V
ENSG00000236283	AC013463.2	antisense	5.48272e-05	V
ENSG00000269535	CTD-2525I3.6	antisense	5.51324e-05	V
ENSG00000226143	RP1-138B7.5	antisense	5.95345e-05	V
ENSG00000213600	XXcos-LUCA16.1	sense_intronic	6.22433e-05	V
ENSG00000252150	AC092574.2	pri-miRNA	6.26415e-05	V
ENSG00000237200	ZBTB40-IT1	sense_intronic	6.84034e-05	V
ENSG00000255933	RP11-495K9.5	lincRNA	6.86637e-05	V
ENSG00000209042	SNORD12C	snoRNA	6.93931e-05	V
ENSG00000258768	CTD-2292M16.8	lincRNA	7.08793e-05	V
ENSG00000223692	DIP2A-IT1	sense_intronic	7.09617e-05	V
ENSG00000206680	SNORD21	snoRNA	7.40234e-05	V
ENSG00000262703	RP11-485G7.6	antisense	7.68853e-05	V
ENSG00000268764	CTC-450M9.1	antisense	8.2794e-05	V
ENSG00000265666	RARA-AS1	antisense	8.52183e-05	V
ENSG00000232912	RP5-1115A15.1	antisense	8.55485e-05	V
ENSG00000260911	RP11-196G11.2	lincRNA	9.09007e-05	V
ENSG00000254281	KB-1507C5.4	lincRNA	9.62498e-05	V
ENSG00000272033	RP11-52A20.2	sense_intronic	0.00010205	V
ENSG00000232073	RP1-302D9.3	antisense	0.000130509	V
ENSG00000179935	LINC00652	lincRNA	0.000137404	V
ENSG00000259307	PLCB2-AS1	antisense	0.000138111	V
ENSG00000256250	RP11-989F5.1	lincRNA	0.000141479	V
ENSG00000269653	CTB-102L5.7	sense_intronic	0.000142432	V
ENSG00000225187	AC073283.7	antisense	0.000152216	V
ENSG00000267226	RP11-126O1.5	antisense	0.000161854	V
ENSG00000270066	SCARNA2	lincRNA	0.000184173	V
ENSG00000278249	SCARNA2	snoRNA	0.000184195	V
ENSG00000276712	miR-7111	pri-miRNA	0.000189547	V
ENSG00000269906	RP11-248J18.2	sense_intronic	0.000233081	V
ENSG00000238287	RP11-656D10.3	antisense	0.000234962	V
ENSG00000268938	AC005387.3	antisense	0.00024692	V
ENSG00000266208	CTD-2267D19.3	antisense	0.000328431	V
ENSG00000261064	RP11-1000B6.3	lincRNA	0.000378382	V
ENSG00000264286	AL138930.1	pri-miRNA	0.00042619	V
ENSG00000262228	RP11-676J12.4	lincRNA	0.000435685	V
ENSG00000231535	LINC00278	lincRNA	0.000501052	V
ENSG00000229848	RP13-766D20.2	antisense	0.000781667	V
ENSG00000259065	RP5-1021I20.1	antisense	0.000926306	V
ENSG00000271798	SNORA51	snoRNA	0.00140333	V
ENSG00000260896	RP11-314O13.1	lincRNA	0.00153443	V
ENSG00000229487	ALG13-AS1	antisense	0.00158771	V
ENSG00000237604	AP001056.1	lincRNA	0.00394695	V
*p-value based on ANOVA-like QL F-test
